# Supplementary material
Source: MDPI journal article supplement (https://www.mdpi.com/2227-9717/9/10/1831)
Supplement: s1 [file s1]

Table S1. Continuous flow electrocoagulation processes.

| Pollutant removed | Initial concentration                  | Type of water     | Electrode material | Operating parameters                                        | Cell volume <sup>a</sup> /<br>Working volume <sup>b</sup> | Removal efficiency (%)   | Cost                     | Aspects evaluated                                                                                | Reference             |
|-------------------|----------------------------------------|-------------------|--------------------|-------------------------------------------------------------|-----------------------------------------------------------|--------------------------|--------------------------|--------------------------------------------------------------------------------------------------|-----------------------|
| Color<br>COD      | Color: 1340 PtCo Unit<br>COD: 870 mg/L | Dyeing wastewater | A: Al<br>C: Al     | $j = 4.45 \text{ mA/cm}^2$<br>$Q = 100 \text{ ml/min}$      | 1.65 L <sup>a</sup><br>1.3 L <sup>b</sup>                 | Color: 41.4<br>COD: 51.4 | -                        | Current density<br>Flow rate<br>Initial concentration<br>Electrode number<br>Electrode gap<br>pH | (Kim et al., 2002)    |
| Orange II - dye   | 10 mg/L                                | Synthetic         | A: Fe<br>C: Fe     | $I = 4.0 \text{ A}$<br>$Q = 350 \text{ mL/min}$             | 450 mL <sup>a</sup>                                       | 98.5                     | -                        | Initial concentration<br>Current density<br>Flow rate<br>Electrolyte concentration<br>pH         | (Mollah et al., 2004) |
| Arsenic           | 0.040 mg/L                             | Well water        | A: Fe<br>C: Fe     | $I = 5 \text{ A}$<br>$Q = 30 \text{ L/min}$<br>R.T. = 1 min | -                                                         | >99                      | 0.002 USD/m <sup>3</sup> | Effect of air injection                                                                          | (Parga et al., 2005a) |

|                    |                                      |                                           |                |                                                                 |                      |                               |                          |                                                                                               |                                |
|--------------------|--------------------------------------|-------------------------------------------|----------------|-----------------------------------------------------------------|----------------------|-------------------------------|--------------------------|-----------------------------------------------------------------------------------------------|--------------------------------|
| Chromium           | 485 mg/L                             | Wastewater                                | A: Fe<br>C: Fe | I = 7 A<br>Q = 600 mL/min<br>$\tau$ = 2 min                     | 1.2 L <sup>a</sup>   | >99                           | -                        | Effect of air injection                                                                       | (Parga et al., 2005b)          |
| Fluoride           | 5 mg/L                               | Synthetic                                 | A: Al<br>C: Al | j = 12.5 A/m <sup>2</sup><br>Q = 200 mL/min<br>$\tau$ = 40 min  | 10.08 L <sup>a</sup> | 95                            | 0.36 AUD/m <sup>3</sup>  | Current density<br>Flow rate<br>Initial concentration<br>pH<br>Residence time                 | (Emamjomeh & Sivakumar, 2009a) |
| Red dye<br>COD     | Dye: 100 mg/L<br>COD: 2500 mg/L      | Wastewater<br>(Textile factory)           | A: Al<br>C: Al | j = 31.25 mA/cm <sup>2</sup><br>$\tau$ = 14 min<br>Q = 37.2 L/h | 8.6 L <sup>a</sup>   | Dye: >85<br>COD: >80          | -                        | Current density<br>Conductivity<br>pH<br>Initial concentration<br>Flow rate<br>Residence time | (Merzouk et al., 2009)         |
| Zinc and phosphate | Zinc: 40 mg/L<br>Phosphate: 120 mg/L | Wastewater<br>(Automotive assembly plant) | A: Al<br>C: Al | j = 60 A/m <sup>2</sup><br>Q = 50 mL/min<br>$\tau$ = 25 min     | 1 L <sup>a</sup>     | Zinc: 99.8<br>Phosphate: 99.9 | 14.5 US\$/m <sup>3</sup> | Current density<br>pH<br>Residence time                                                       | (Koby et al., 2010)            |

|                        |                                 |                                      |                |                                                              |                                         |                         |                         |                                                                           |                         |
|------------------------|---------------------------------|--------------------------------------|----------------|--------------------------------------------------------------|-----------------------------------------|-------------------------|-------------------------|---------------------------------------------------------------------------|-------------------------|
| Arsenic and nitrate    | As: 1 mg/L<br>Nitrate: 300 mg/L | Synthetic                            | A: Fe<br>C: Fe | U = 25 V<br>Q = 2 L/h<br>$\tau$ = 3.86 h                     | 4.97 L <sup>a</sup><br>4 L <sup>b</sup> | As: 75%<br>Nitrate: 84% | -                       | Applied potential<br>Type of water<br>Initial concentration               | (Kumar and Goel, 2010)  |
| Petroleum hydrocarbons | TPH: 64 mg/L                    | Groundwater                          | A: SS<br>C: Fe | j = 18 mA/cm <sup>2</sup><br>$\tau$ = 60 min                 | 200 mL <sup>b</sup>                     | 93.4                    | -                       | Electrode material<br>pH<br>Current density<br>Residence time<br>Aeration | (Moussavi et al., 2011) |
| Turbidity              | 500 – 600 NTU                   | Wastewater<br>(Tissue paper factory) | A: Al<br>C: Al | j = 40 A/m <sup>2</sup><br>Q = 1.6 L                         | 8.19 L <sup>a</sup>                     | 99                      | -                       | Current density<br>Current and potential distribution                     | (Vázquez et al., 2012)  |
| Arsenic                | 59 µg/L                         | Groundwater                          | A: Al<br>C: Al | j = 5 mA/cm <sup>2</sup><br>M.F.R. = 0.91 cm s <sup>-1</sup> | 88.94 mL <sup>a</sup>                   | >99                     | -                       | Current density<br>Mean linear Flow rate                                  | (Flores et al., 2013)   |
| Arsenic                | 150 µg/L                        | Drinking water                       | A: Fe<br>C: Al | j = 2.5 A/m <sup>2</sup><br>Q = 0.05 L/min                   | 1.57 L <sup>a</sup><br>1 L <sup>b</sup> | 96                      | 0.0091 €/m <sup>3</sup> | Flow rate                                                                 | (Koby et al., 2014)     |

|                      |                                       |                                      |                |                                                                              |                         |                    |                            |                                                                      |                        |
|----------------------|---------------------------------------|--------------------------------------|----------------|------------------------------------------------------------------------------|-------------------------|--------------------|----------------------------|----------------------------------------------------------------------|------------------------|
|                      |                                       |                                      | A: Al<br>C: Fe | $\tau = 3 \text{ min}$                                                       |                         |                    |                            | Initial concentration                                                |                        |
| Arsenic              | 51 $\mu\text{g/L}$                    | Groundwater                          | A: Al<br>C: Al | $j = 8.86 \text{ mA/cm}^2$<br>$Q = 7 \text{ L/h}$<br>$\tau = 80 \text{ min}$ | 9 L <sup>a</sup>        | 93                 | 0.25 $\text{€}/\text{m}^3$ | Treatment time<br>Initial pH<br>Electrode passivation<br>Residual Al | (Mohora et al., 2014)  |
| Turbidity            | 400 – 450 NTU                         | Wastewater<br>(Tissue paper factory) | A: Al<br>C: Al | $j = 200 \text{ A/m}^2$<br>$Q = 7.57 \text{ L/min}$                          | 50 L <sup>a</sup>       | 97                 | -                          | Flow rate<br>Current distribution                                    | (Vázquez et al., 2014) |
| Nickel               | 100 mg/L                              | Tap water                            | A: Al<br>C: Al | $j = 22.5 \text{ A/m}^2$<br>$\tau = 30 \text{ min}$<br>$\text{pH} = 6$       | 120 mL <sup>a,b</sup>   | 98                 | -                          | Current density<br>Residence time<br>Initial pH                      | (Lu et al., 2015)      |
| Fluoride             | 10 mg/L                               | Tap water                            | A: Al<br>C: Al | $j = 7.5 \text{ A/m}^2$<br>$\tau = 20 \text{ min}$<br>$\text{pH} = 6$        | 220 mL <sup>b</sup>     | 92.74              | -                          | Current density<br>Residence time<br>Initial pH                      | (Lu et al., 2016)      |
| Arsenic and fluoride | As: 43 $\mu\text{g/L}$<br>F: 2.5 mg/L | Groundwater                          | A: Al<br>C: Al | $j = 4 \text{ mA/cm}^2$<br>M.F.R. = 1.82 cm/s                                | 88.94 cm <sup>3 a</sup> | As: >99<br>F: 84.4 | -                          | Current density                                                      | (Guzmán et al., 2016)  |

|                        |                              |                      |                |                                                                           |                                          |                        |                         |                                                                                                    |                                 |
|------------------------|------------------------------|----------------------|----------------|---------------------------------------------------------------------------|------------------------------------------|------------------------|-------------------------|----------------------------------------------------------------------------------------------------|---------------------------------|
| (simultaneous removal) |                              |                      |                |                                                                           |                                          |                        |                         | Mean linear flow rate                                                                              |                                 |
| COD                    | 274 mg/L                     | Municipal wastewater | A: Al<br>C: Al | $j = 2 \text{ mA/cm}^2$<br>$\tau = 5 \text{ min}$                         | 8.3 L <sup>a</sup><br>1.5 L <sup>b</sup> | 67.15                  | 0.07 USD/m <sup>3</sup> | Current density<br>Residence time<br>Initial concentration                                         | (Makwana and Ahammed, 2016)     |
| Iron                   | 50 mg/L                      | Synthetic            | A: Fe<br>C: SS | $j = 10 \text{ mA/cm}^2$<br>$Q = 40 \text{ L/h}$<br>$\tau = 46 \text{ s}$ | -                                        | >99                    | -                       | Current density<br>pH                                                                              | (Gaalova et al., 2018)          |
| Arsenic                | 38.15 µg/L                   | Groundwater          | A: Fe<br>C: Fe | $j = 1.98 \text{ A/m}^2$<br>$Q = 12 \text{ L/h}$                          | 7.9 L <sup>b</sup>                       | 96                     | 0.0135 €/m <sup>3</sup> | Current density<br>pH evolution<br>Residual Fe concentration<br>Flow rate<br>Electrode passivation | (Mohora et al., 2018)           |
| Arsenic and antimony   | As: 500 µg/L<br>Sb: 500 µg/L | Synthetic            | A: Fe<br>C: Fe | $j = 13.89 \text{ A/m}^2$<br>$Q = 0.043 \text{ L/min}$                    | -                                        | As: 99.73<br>Sb: 94.87 | -                       | Flow rate<br>Potential and current distribution                                                    | (Song et al., 2018)             |
| Nitrate                | 100 mg/L                     | Tap water            | A: Al<br>C: Al | $j = 70\text{-}80 \text{ A/m}^2$<br>$Q = 100 \text{ mL/min}$              | 2.4 L <sup>b</sup>                       | >60                    | DC:                     | Effect of AC and DC                                                                                | (Karamati-Niaragh et al., 2019) |

|                                                      |                                                                                                             |                                      |                    |                                                                                          |                     |                                                                              |                                                                                       |                                                                                                     |                            |
|------------------------------------------------------|-------------------------------------------------------------------------------------------------------------|--------------------------------------|--------------------|------------------------------------------------------------------------------------------|---------------------|------------------------------------------------------------------------------|---------------------------------------------------------------------------------------|-----------------------------------------------------------------------------------------------------|----------------------------|
|                                                      |                                                                                                             |                                      |                    | $\tau = 48 \text{ min}$                                                                  |                     |                                                                              | 54 US\$/ (kg<br>nitrate<br>removed)<br><br>AC:<br>29 US\$/ (kg<br>nitrate<br>removed) | Initial<br>concentration<br><br>Flow rate<br><br>Current<br>density<br><br>Initial pH               |                            |
| Arsenic and<br>fluoride<br>(simultaneous<br>removal) | As: 50.4 $\mu\text{g/L}$<br><br>F: 5.5 mg/L                                                                 | Groundwater                          | A: Al<br><br>C: Al | $j = 6 \text{ mA/cm}^2$<br><br>M.F.R. = 0.23 cm/s                                        | -                   | As: 81.74<br><br>F: 91.63                                                    | -                                                                                     | Current<br>density<br><br>Mean linear<br>flow rate                                                  | (Sandoval et<br>al., 2019) |
| Arsenic and<br>fluoride<br>(simultaneous<br>removal) | As: 550 $\mu\text{g/L}$<br><br>F: 12 mg/L                                                                   | Synthetic                            | A: Al<br><br>C: Al | $Q = 0.88 \text{ L/h}$<br><br>$\tau = 95 \text{ min}$                                    | 1.4 L <sup>b</sup>  | As: 98.83<br><br>F: 87.5                                                     | 0.358 USD/m <sup>3</sup>                                                              | Flow rate<br><br>Residence<br>time                                                                  | (Thakur et al.,<br>2019)   |
| Color<br><br>COD<br><br>Turbidity<br><br>Alkalinity  | COD: 1500-1600<br>mg/L<br><br>Turbidity: 39-45<br>NTU<br><br>Alkalinity: 230-285<br>mg CaCO <sub>3</sub> /L | Industrial<br>licorice<br>wastewater | A: Fe<br><br>C: Fe | $j = 350 \text{ A/m}^2$<br><br>$\tau = 81.8 \text{ min}$                                 | 5.88 L <sup>b</sup> | Color: 90.1<br><br>COD: 89.4<br><br>Turbidity: 82<br><br>Alkalinity:<br>73.3 | -                                                                                     | Current<br>density<br><br>Treatment<br>time<br><br>NaCl<br>concentration<br><br>Mixing<br>intensity | (Abbasi et al.,<br>2020)   |
| Boron                                                | 15 mg/L                                                                                                     | Produced<br>water                    | A: Al<br><br>C: Al | $j = 12.5 \text{ mA/cm}^2$<br><br>$Q = 20 \text{ mL/min}$<br><br>$\tau = 45 \text{ min}$ | 0.9 L <sup>b</sup>  | 84                                                                           | 0.2 USD/m <sup>3</sup>                                                                | Initial<br>concentration<br><br>Electrode<br>material<br><br>Electrode gap                          | (Ezechi et al.,<br>2020)   |

|                                    |                                                      |                                 |                            |                                                                                          |                                        |                                          |                         |                                                                  |                           |
|------------------------------------|------------------------------------------------------|---------------------------------|----------------------------|------------------------------------------------------------------------------------------|----------------------------------------|------------------------------------------|-------------------------|------------------------------------------------------------------|---------------------------|
|                                    |                                                      |                                 |                            |                                                                                          |                                        |                                          |                         | Residence time                                                   |                           |
| Algae<br><i>Chlorella vulgaris</i> | 195 mg/L                                             | Synthetic                       | A: Fe<br>C: SS             | $j = 3.2 \text{ mA/cm}^2$<br>$Q = 10 \text{ L/h}$<br>$\tau = 1.32 \text{ min}$           | $0.073 \text{ L}^a$                    | 88                                       | $0.03 \text{ €/m}^3$    | Electrode material                                               | (Parmentier et al., 2020) |
| Color<br>(Reactive Blue)           | 140 mg/L                                             | Synthetic                       | A: Fe (Particles)<br>C: Al | $I = 3 \text{ A}$<br>$\text{pH} = 3$<br>$Q = 24 \text{ L/h}$<br>$\tau = 0.2 \text{ min}$ | -                                      | 98                                       | -                       | Initial pH<br>Flow rate<br>Current                               | (Rodrigues et al., 2020)  |
| Arsenic                            | 0.1 mg/L                                             | Synthetic                       | A: SS<br>C: SS             | $Q = 12 \text{ L/h}$<br>$\tau = 5 \text{ min}$                                           | $1.0 \text{ L}^b$                      | >91                                      | $0.240 \text{ AUD/m}^3$ | Flow rate<br>Residence time                                      | (Nguyen et al., 2021)     |
| Iron                               | 10 mg/L                                              | Synthetic                       | A: Al<br>C: Al             | $j = 3 \text{ mA/cm}^2$<br>$\tau = 50 \text{ min}$                                       | $1.0 \text{ L}^a$                      | >99.9                                    | $0.623 \text{ £/m}^3$   | Current density<br>pH<br>Initial concentration<br>Treatment time | (Abdulhadi et al., 2021)  |
| Color<br>COD<br>TSS                | Color: 2846 Pt-Co<br>COD: 2180 mg/L<br>TSS: 420 mg/L | Wastewater<br>(Textile factory) | A: Fe<br>C: Fe             | $U = 70 \text{ V}$<br>$Q = 0.5 \text{ L/min}$                                            | $1.4 \text{ L}^a$<br>$1.0 \text{ L}^b$ | Color: 96.87<br>COD: 89.77<br>TSS: 84.46 | $0.75 \text{ USD/m}^3$  | pH<br>Voltage<br>Flow rate                                       | (Hendaoui et al., 2021)   |

|               |                     |                                        |                |                                                              |                     |               |                       |                                                                                          |                                |
|---------------|---------------------|----------------------------------------|----------------|--------------------------------------------------------------|---------------------|---------------|-----------------------|------------------------------------------------------------------------------------------|--------------------------------|
| Turbidity     | Turbidity: 1095 NTU | Wastewater<br>(Metallurgical industry) | A: Fe<br>C: Al | I = 12 A<br>Q = 135 L/h                                      | 155 L <sup>a</sup>  | Turbidity: 91 | 0.07 €/m <sup>3</sup> | Anode material<br>Current                                                                | (Kuokkanen et al., 2021)       |
| COD           | COD: 330 mg/L       |                                        |                |                                                              |                     | COD: >91      |                       |                                                                                          |                                |
| Al            | Al: 3.81 mg/L       |                                        |                |                                                              |                     | Al: 85        |                       |                                                                                          |                                |
| Cr            | Cr:3.63 mg/L        |                                        |                |                                                              |                     | Cr: 95        |                       |                                                                                          |                                |
| Zn            | Zn:70.4 mg/L        |                                        |                |                                                              |                     | Zn: 93        |                       |                                                                                          |                                |
| Methyl orange | 134 mg/L            | Synthetic                              | A: Fe<br>C: Fe | j = 10.1 mA/cm <sup>2</sup><br>Q = 60 L/h<br>$\tau$ = 30 min | 1.15 L <sup>a</sup> | 92.35         | -                     | Current density<br>Initial concentration<br>Flow rate<br>Treatment time<br>Electrode gap | (Wu et al., 2021)              |
| Turbidity     | 108 NTU             | Synthetic                              | A: Al<br>C: Al | U = 6.85 V<br>Q = 79.4 L/h<br>$\tau$ = 6.5 min               | 8.6 L <sup>b</sup>  | 85.6          | \$0.031 USD           | Number of electrodes                                                                     | (Ntambwe Kambuyi et al., 2022) |

j: Current density; I: Operating current; Q: Inlet flow rate;  $\tau$ : Residence time in the EC cell; COD: Chemical oxygen demand; TSS: Total suspended solid; TPH: total petroleum hydrocarbon; SS: Stainless Steel; U: Cell potential; TOC: Total organic carbon
